# Supplementary material for: Effect of a financial incentive (shopping point) on increasing the number of daily walking steps among community-dwelling adults in Japan: a randomised controlled trial
Source: PubMed Central journal article supplement — BMJ Open. 2020 Nov 4;10(11):e037303. doi: 10.1136/bmjopen-2020-037303 (PMC7643498; doi:10.1136/bmjopen-2020-037303), 2020-11-04
Supplement: bmjopen-2020-037303supp001.pdf [file bmjopen-2020-037303supp001.pdf]

Supplementary Table 1. Comparison of steps between baseline and the intervention period (weeks 4-6) (n = 72).

|              | n  | Number of steps, mean (SD) |                     | Increase in number of steps |                 |                      | Increase rate <sup>b</sup> |                 |                      |
|--------------|----|----------------------------|---------------------|-----------------------------|-----------------|----------------------|----------------------------|-----------------|----------------------|
|              |    | Baseline                   | Intervention period | Mean                        | (95% CI)        | p-value <sup>a</sup> | Mean                       | (95% CI)        | p-value <sup>a</sup> |
| Intervention | 36 | 6859 ( 3223 )              | 8510 ( 3155 )       | 1650                        | ( 1182 , 2119 ) | < 0.001              | 31.0                       | ( 20.9 , 41.2 ) | < 0.001              |
| Control      | 36 | 5869 ( 2249 )              | 6383 ( 2737 )       | 514                         | ( 136 , 891 )   |                      | 9.1                        | ( 2.5 , 15.7 )  |                      |

CI, confidence interval.

<sup>a</sup> *t*-test.

<sup>b</sup> Rate (%) of change in mean number of steps/day.

Supplementary Table 2. Comparison of steps between baseline and the follow-up period (weeks 7-9) (n = 72).

|              | n  | Number of steps, mean (SD) |               | Increase in number of steps |                |                      | Increase rate <sup>b</sup> |                |                      |
|--------------|----|----------------------------|---------------|-----------------------------|----------------|----------------------|----------------------------|----------------|----------------------|
|              |    | Baseline                   | Follow-up     | Mean                        | (95% CI)       | p-value <sup>a</sup> | Mean                       | (95% CI)       | p-value <sup>a</sup> |
| Intervention | 36 | 6859 ( 3223 )              | 7793 ( 3166 ) | 933                         | ( 312 , 1555 ) | 0.311                | 20.3                       | ( 7.6 , 33.1 ) | 0.270                |
| Control      | 36 | 5869 ( 2249 )              | 6425 ( 2504 ) | 556                         | ( 136 , 976 )  |                      | 12.1                       | ( 4.2 , 20.0 ) |                      |

CI, confidence interval.

<sup>a</sup> t-test.

<sup>b</sup> Rate (%) of change in mean number of steps/day.
